# Supplementary material for: The Co-Morbidity between Bipolar and Panic Disorder in Fibromyalgia Syndrome
Source: MDPI journal article supplement (doi:10.3390/jcm9113619), 2020-11-10
Supplement: s1 [file s1]

Table S1. Comparison between FM patients with and without comorbid threshold and subthreshold BD/PD

|                            | CO-MORBID<br>THRESHOLD AND<br>SUBTHRESHOLD BD<br>AND PD | NO CO-MORBID<br>THRESHOLD<br>SUBTHRESHOLD<br>BD AND PD | t or X <sup>2</sup> | p-value |
|----------------------------|---------------------------------------------------------|--------------------------------------------------------|---------------------|---------|
| Number of patients N.(%)   | 81 (68.6)                                               | 37 (31.4)                                              |                     |         |
| Sex N.(%)                  |                                                         |                                                        |                     |         |
| - Male                     | 7(8.6)                                                  | 4 (10.8)                                               | .141                | .739    |
| - Female                   | 74 (91.4)                                               | 33 (89.2)                                              |                     |         |
| Age (years)                | 46.7±11.7                                               | 43.4 ±12.5                                             | 1.35                | .177    |
| Education (years)          | 11.5±3.2                                                | 11.8±3.8                                               | -.450               | .654    |
| Marital status N.(%)       |                                                         |                                                        |                     |         |
| - Single                   | 16(19.8)                                                | 8(21.6)                                                |                     |         |
| - Married                  | 52(64.2)                                                | 21(56.8)                                               | .714                | .700    |
| - Divorced/widowed         | 13(16)                                                  | 8(21.6)                                                |                     |         |
| Occupation N.(%)           |                                                         |                                                        |                     |         |
| - Manager                  | 9(11.1)                                                 | 3(8.1)                                                 |                     |         |
| - White collar             | 33(40.7)                                                | 19(51.4)                                               | 3.991               | .262    |
| - Blue collar              | 28(34.6)                                                | 7(18.9)                                                |                     |         |
| - Unemployed               | 11(13.6)                                                | 8(21.6)                                                |                     |         |
| Age at Onset of FM (years) | 35.4 ± 13.1                                             | 36.6 ± 13.6                                            | .687                | .494    |
| Duration of FM (months)    | 134.9 ± 117.6                                           | 116.7 ± 107.2                                          | .791                | .431    |
| Time to FM diagnosis       | 103 ± 103.5                                             | 73.31 ± 97.86                                          | -1.378              | .171    |
| BMI                        | 24.1 ± 3.7                                              | 24.1 ± 4                                               | .075                | .940    |
| VAS pain                   | 8.1 ± 1.02                                              | 8.2 ± 0.9                                              | -.474               | .636    |
| FIQ                        | 77.3 ± 11.3                                             | 76.1 ± 12.6                                            | .456                | .649    |
| FAS                        | 7.5 ± 1.2                                               | 7.7 ± 1.1                                              | .403                | .688    |
| HAQ                        | 1.06 ± 0.4                                              | 1.07 ± 0.5                                             | -.065               | .948    |

Values are mean (SD) or number (N) and percentage (%). Chi square test was used for categorical variables, and t-test was used for continuous variables.

BMI: Body Mass Index; VAS pain: Visual Analog Scale for Pain (included in FIQ); FIQ: Fibromyalgia Impact Questionnaire; FAS Fibromyalgia Assessment Scale; HAQ: Health Assessment Questionnaire
